# Supplementary material
Source: publisher figshare collection journal article supplement (https://karger.figshare.com/articles/dataset/_/3490307)
Supplement: Supplementary file 1 [file 2]

**Figure S1. Gene expression of cytokine and chemokine after RSV exposure of AMs.** Primary wt AMs were exposed for 20h to medium or the indicated multiplicities of infection (MOI) of RSV or UV-RSV (MOI of 2; UV2). Levels of *Ifna6*, *Ifnb*, *Cxcl10*, *Tnfa*, *Il6* and *Ccl3* transcripts in AMs were measured by quantitative RT-PCR. Each point depicts data from an individual experiment with RNA pooled from 2-3 individual cultures per stimulation.

**Figure S2. RSV L and N gene copies in AMs and LA4 cells.** AMs from wt, *Mavs*<sup>-/-</sup> and *Ifnar1*<sup>-/-</sup> mice and LA4 cells were exposed to medium or MOI of 2 of UV-inactivated RSV (AM UV and LA4 UV) or RSV for 1h, 24h and 48h. RSV L and N gene copies were determined by RT-PCR. The UV AM show pooled measurements of L and N genes from all genotypes of AMs. The data are shown as mean ± SEM of 3-4 individual RNA samples pooled from 3 independent experiments. Statistical significance of differences between indicated groups was determined by unpaired Student's *t* test. “\*” represents differences between LA4 and wt AM, “\$” between wt and *Ifnar1*<sup>-/-</sup> AMs and “#” between wt and *Mavs*<sup>-/-</sup> AMs. \*p<0.05; \*\*p<0.01; \*\*\*p<0.001.
